# Supplementary material for: Brain–Computer Interface–Based Communication in the Completely Locked-In State
Source: PLOS journal article supplement (doi:10.1371/journal.pbio.1002593), 2017-01-31
Supplement: S7 (10.1371/journal.pbio.1002593.s007) [file journal.pbio.1002593.s007]

## Sheet: Sheet1
Total sentences	Predicted True	Predicted False	Contingency indexes
True sentences	362 (264.00) [36.38]	148 (246.00) [39.04]	TPR = .71
False sentences	166 (264.00) [36.38]	344 (246.00) [39.04]	FPR = .33
