# Supplementary material for: Brain–Computer Interface–Based Communication in the Completely Locked-In State
Source: PLOS journal article supplement (doi:10.1371/journal.pbio.1002593), 2017-01-31
Supplement: S14 (10.1371/journal.pbio.1002593.s014) [file journal.pbio.1002593.s014]

## Sheet: Sheet1
Total sentences	Predicted True	Predicted False	Contingency indexes
True sentences	35 (28.5) [1.48]	5 (11.50) [3.67]	TPR = .88
False sentences	22 (28.50) [1.48]	18 (16.00) [5.06]	FPR = .55
